# Supplementary material for: Rhodium(i) N-heterocyclic carbene complexes: synthesis and cytotoxic properties
Source: Royal Society of Chemistry journal article supplement (doi:10.1039/d1nj00144b), 2021-01-01
Supplement: d1nj00144b1.pdf [file d1nj00144b1.pdf]

## Supplementary Material

for

### **Rhodium(I) *N*-heterocyclic carbene Complexes: Synthesis and cytotoxic Properties**

Ichraf Slimani,<sup>a,b</sup> Serap Şahin-Bölükbaşı,<sup>c</sup> Mustafa Ulu,<sup>c</sup> Enes Evren,<sup>b</sup> Nevin Gürbüz,<sup>b,d</sup> İlknur Özdemir,<sup>d</sup> Naceur Hamdi,<sup>e,f</sup> İsmail Özdemir<sup>b,d</sup>

<sup>a</sup> Research Laboratory of Environmental Sciences and Technologies (LR16ES09), Higher Institute of Environmental Sciences and Technology, University of Carthage, Hammam-Lif, Tunisia.

<sup>b</sup>Inönü University, Catalysis Research and Application Center, 44280 Malatya, Turkey

<sup>c</sup>Cumhuriyet University, Faculty of Pharmacy, Department of Biochemistry, 58140 Sivas, Turkey

<sup>d</sup>Inönü University, Faculty of Science and Arts, Department of Chemistry, 44280 Malatya, Turkey

<sup>e</sup>Research Laboratory of Environmental Sciences and Technologies (LR16ES09), Higher Institute of Environmental Sciences and Technology, University of Carthage, Hammam-Lif 2050, Tunisia.

<sup>f</sup>Department of Chemistry, College of Science and Arts, Qassim University, Ar Rass 52719, Saudi Arabia

## Content

|                                                                               | <b>Page</b> |
|-------------------------------------------------------------------------------|-------------|
| <b>Figure 1.</b> $^1\text{H}$ and $^{13}\text{C}$ NMR spectrums of <b>1a</b>  | 3           |
| <b>Figure 2.</b> FT-IR spectrum of <b>1a</b>                                  | 4           |
| <b>Figure 3.</b> $^1\text{H}$ and $^{13}\text{C}$ NMR spectrums of <b>1b</b>  | 5           |
| <b>Figure 4.</b> FT-IR spectrum of <b>1b</b>                                  | 6           |
| <b>Figure 5.</b> $^1\text{H}$ and $^{13}\text{C}$ NMR spectrums of <b>1c</b>  | 7           |
| <b>Figure 6.</b> FT-IR spectrum of <b>1c</b>                                  | 8           |
| <b>Figure 7.</b> $^1\text{H}$ and $^{13}\text{C}$ NMR spectrums of <b>1d</b>  | 9           |
| <b>Figure 8.</b> FT-IR spectrum of <b>1d</b>                                  | 10          |
| <b>Figure 9.</b> $^1\text{H}$ and $^{13}\text{C}$ NMR spectrums of <b>2a</b>  | 11          |
| <b>Figure 10.</b> FT-IR spectrum of <b>2a</b>                                 | 12          |
| <b>Figure 11.</b> $^1\text{H}$ and $^{13}\text{C}$ NMR spectrums of <b>2b</b> | 13          |
| <b>Figure 12.</b> FT-IR spectrum of <b>2b</b>                                 | 14          |
| <b>Figure 13.</b> $^1\text{H}$ and $^{13}\text{C}$ NMR spectrums of <b>2c</b> | 15          |
| <b>Figure 14.</b> FT-IR spectrum of <b>2c</b>                                 | 16          |
| <b>Figure 15.</b> $^1\text{H}$ and $^{13}\text{N}$ MNR spectrums of <b>2d</b> | 17          |
| <b>Figure 16.</b> FT-IR spectrum of <b>2d</b>                                 | 18          |

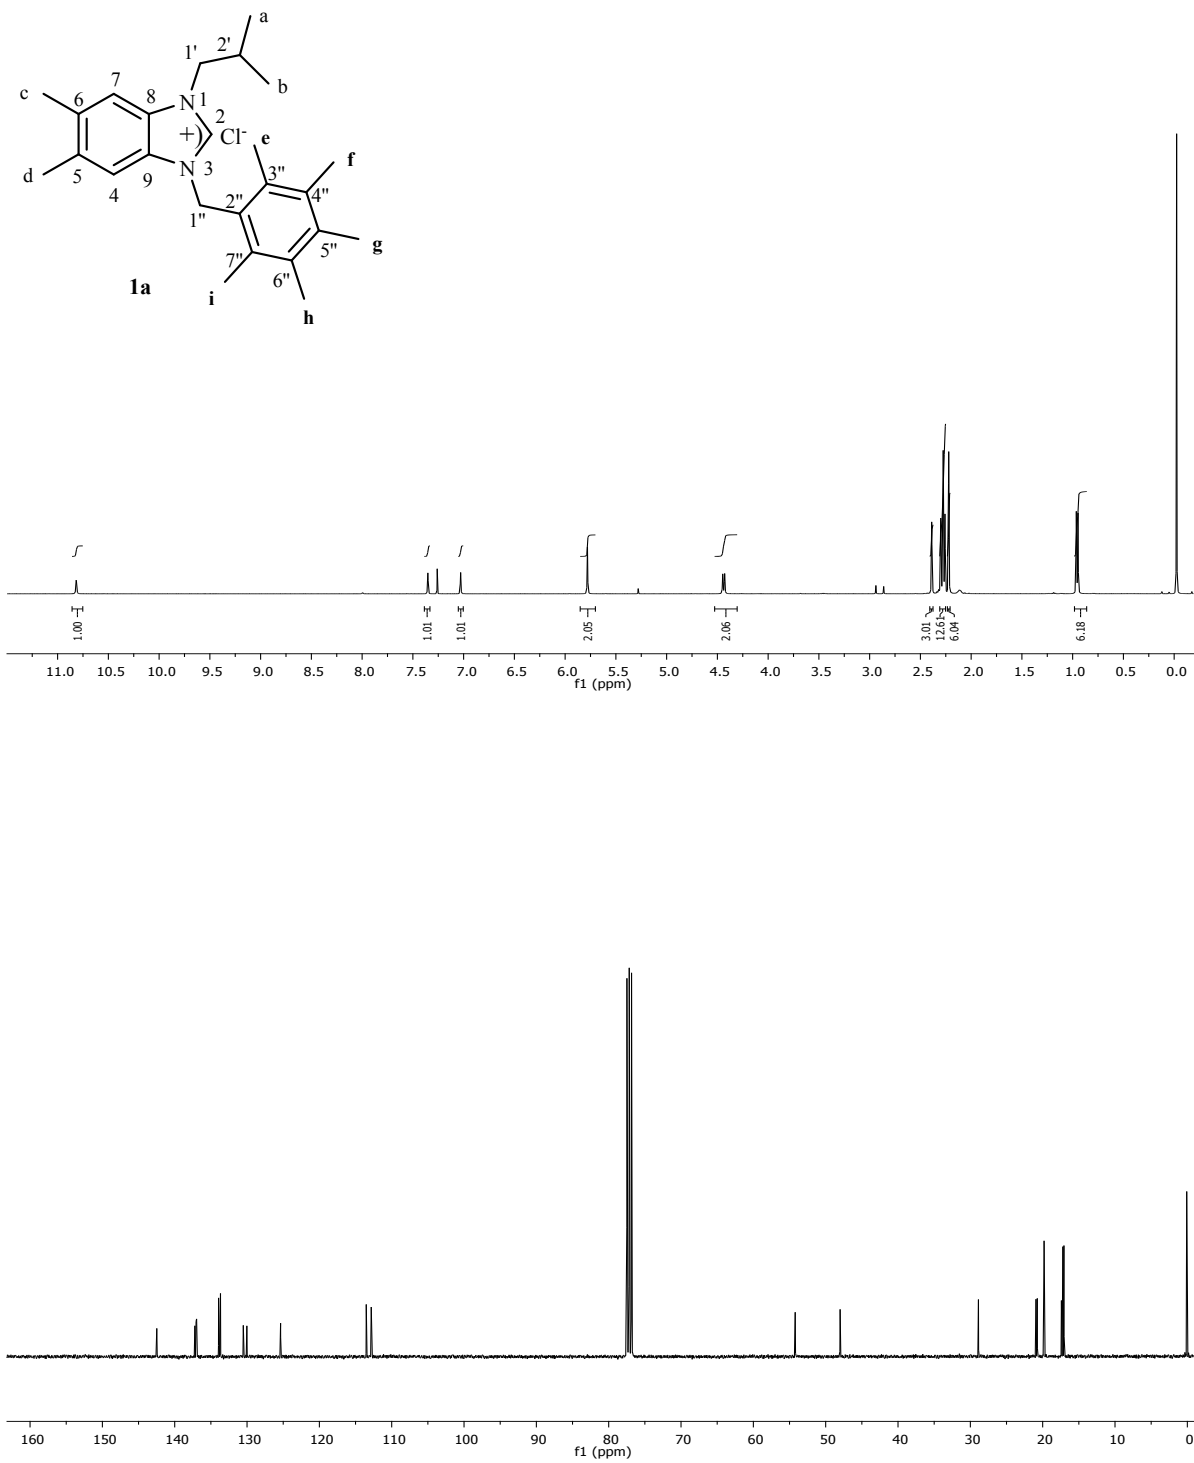

**Figure 1.**  $^1\text{H}$  and  $^{13}\text{C}\{^1\text{H}\}$  NMR spectrums of **1a**

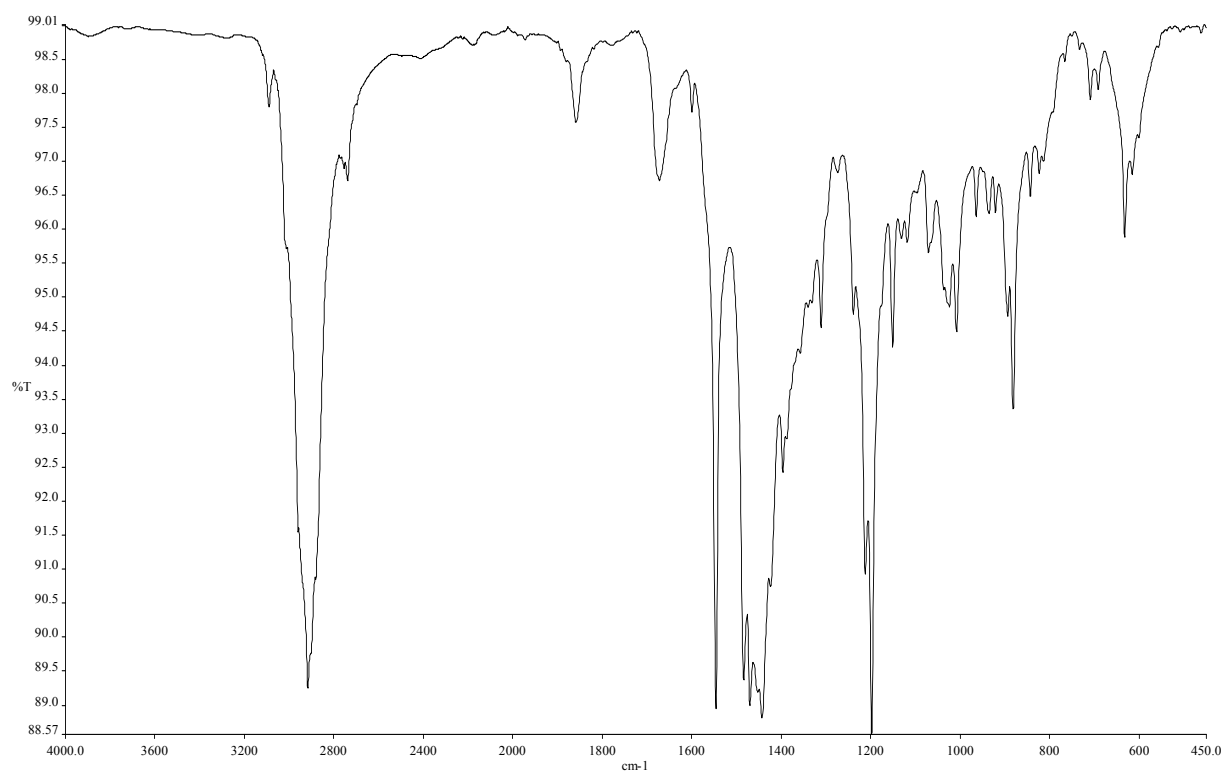

**Figure 2.** FT-IR spectrum of **1a**

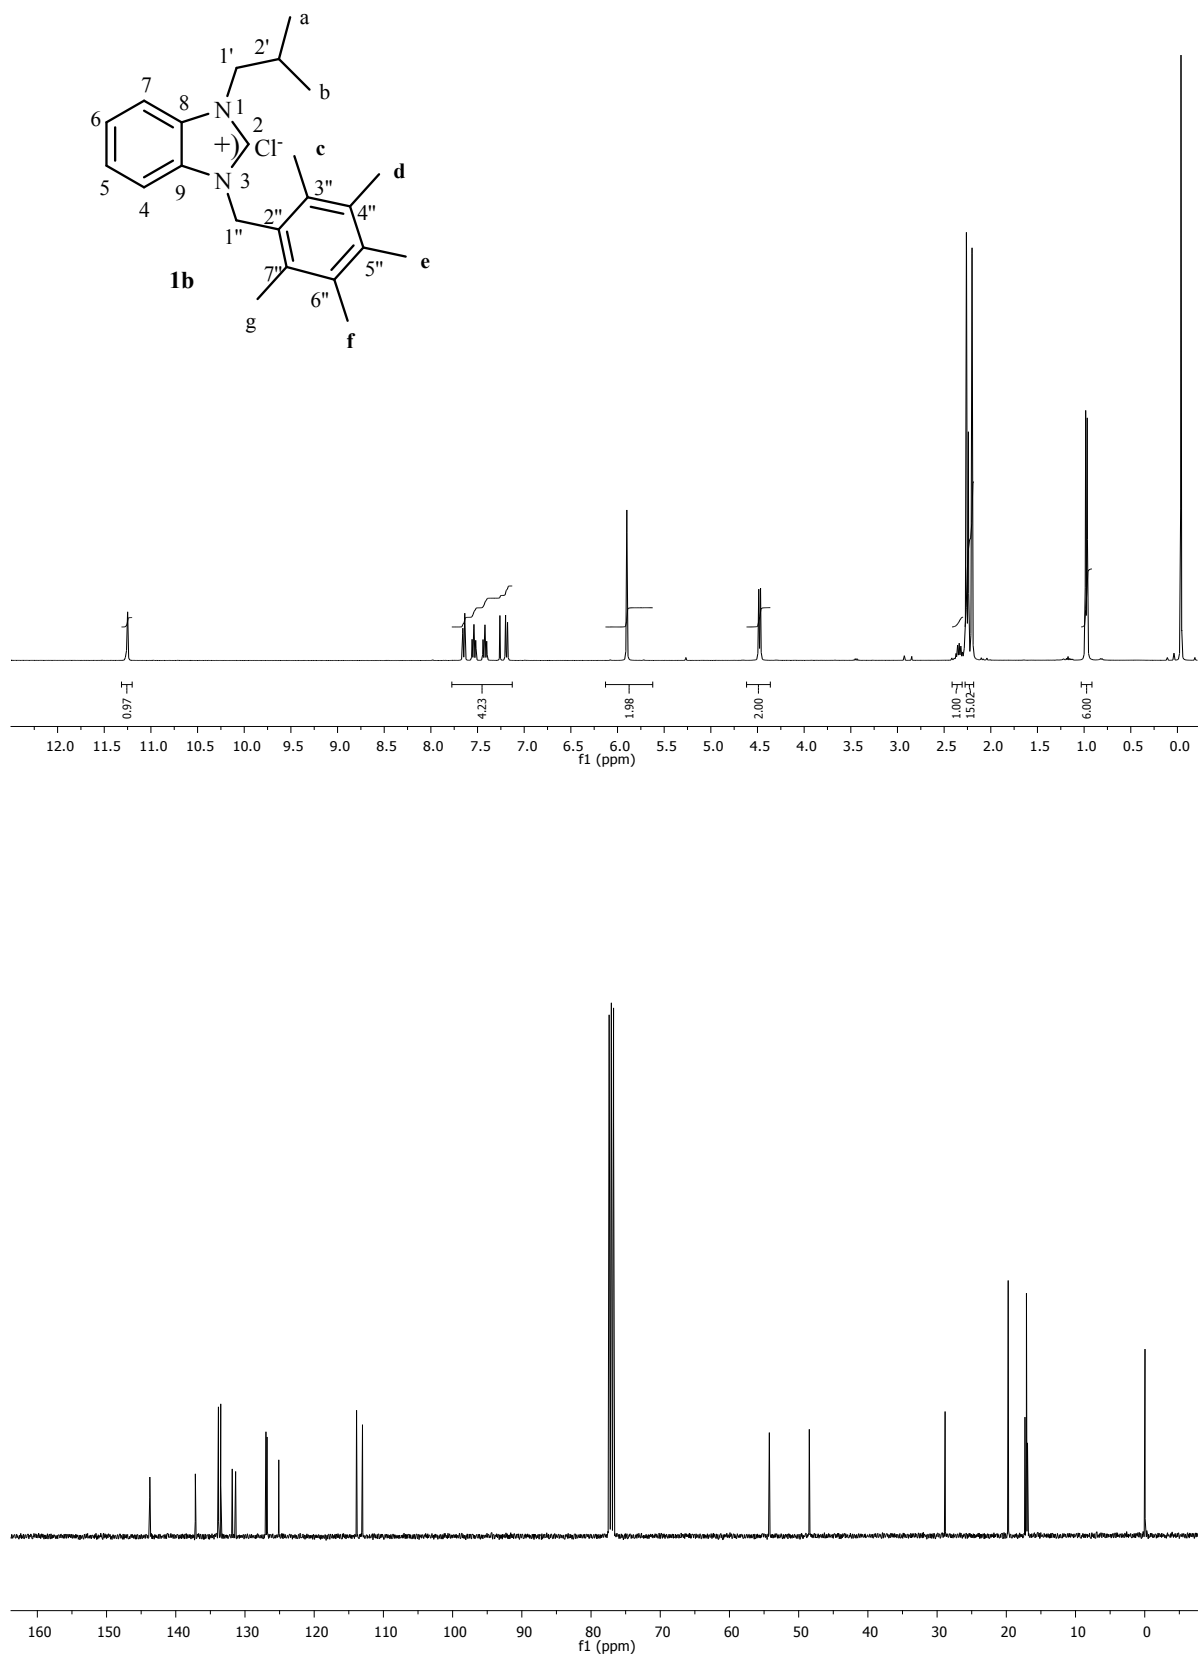

**Figure 3.**  $^1\text{H}$  and  $^{13}\text{C}\{^1\text{H}\}$  NMR spectrums of **1b**

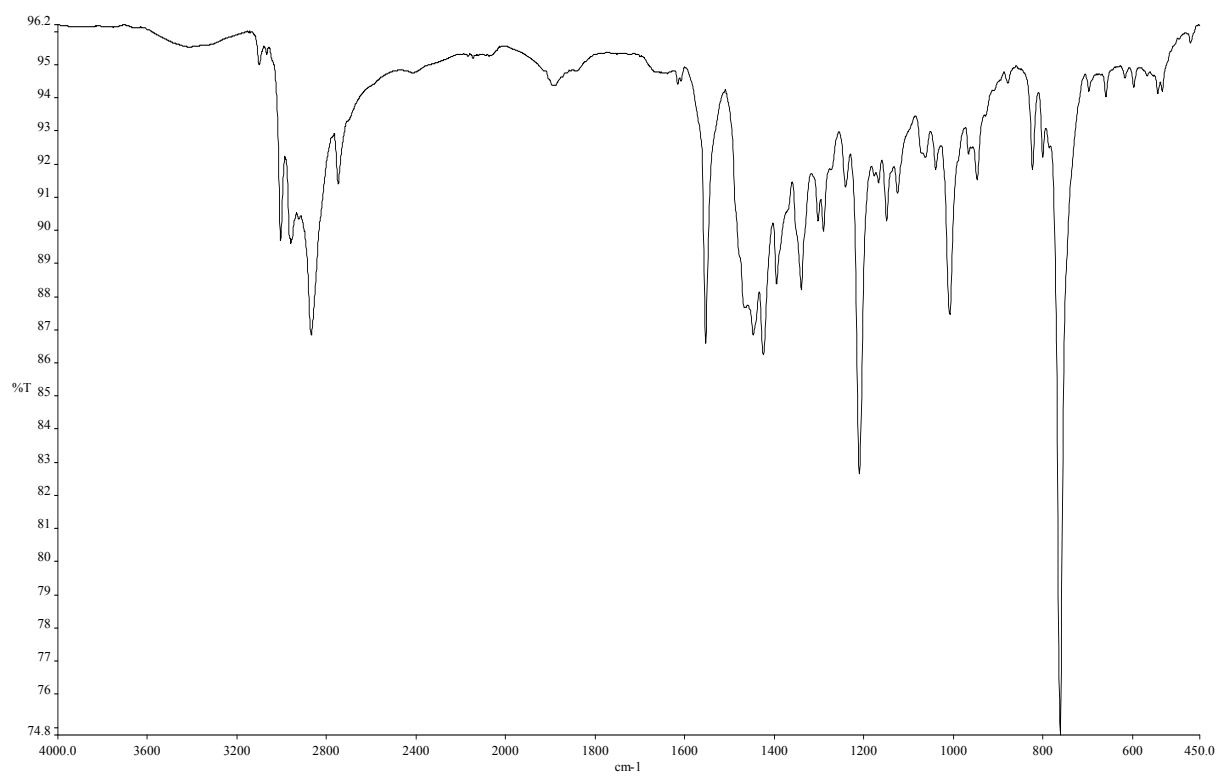

**Figure 4.** FT-IR spectrum of **1b**

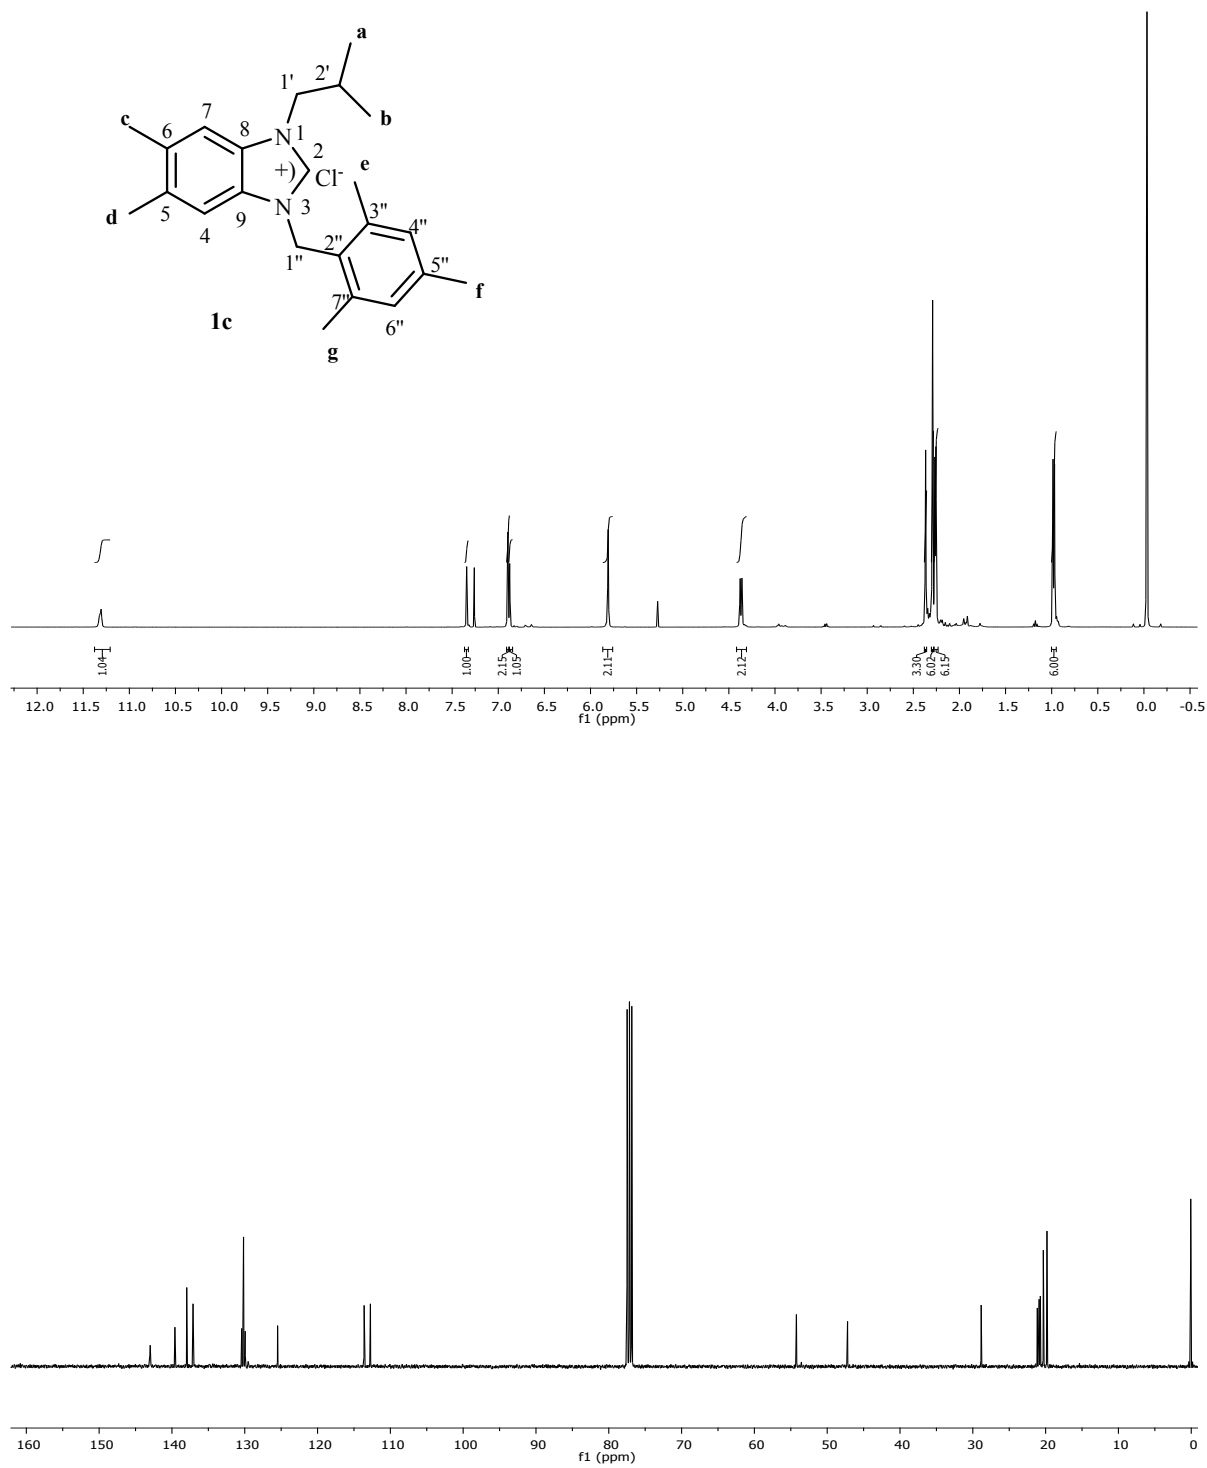

**Figure 5.**  $^1\text{H}$  and  $^{13}\text{C}\{^1\text{H}\}$  NMR spectra of **1c**

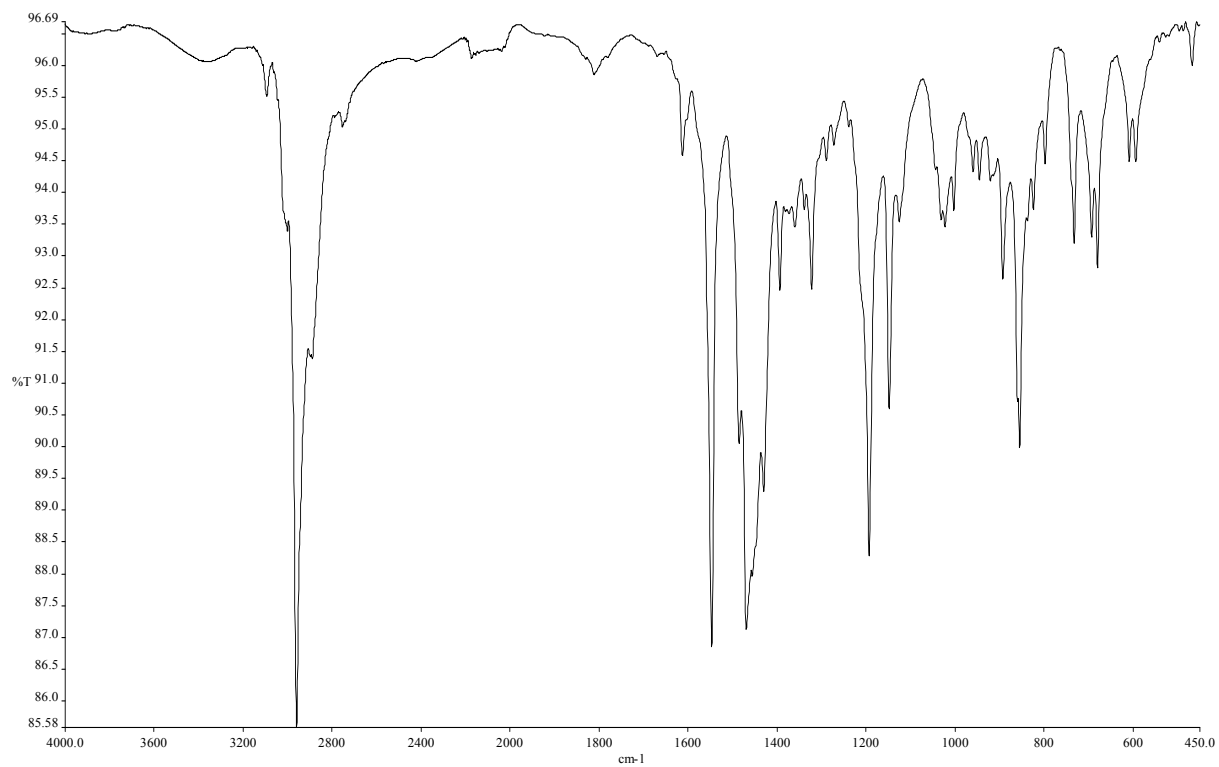

**Figure 6.** FT-IR spectrum of **1c**



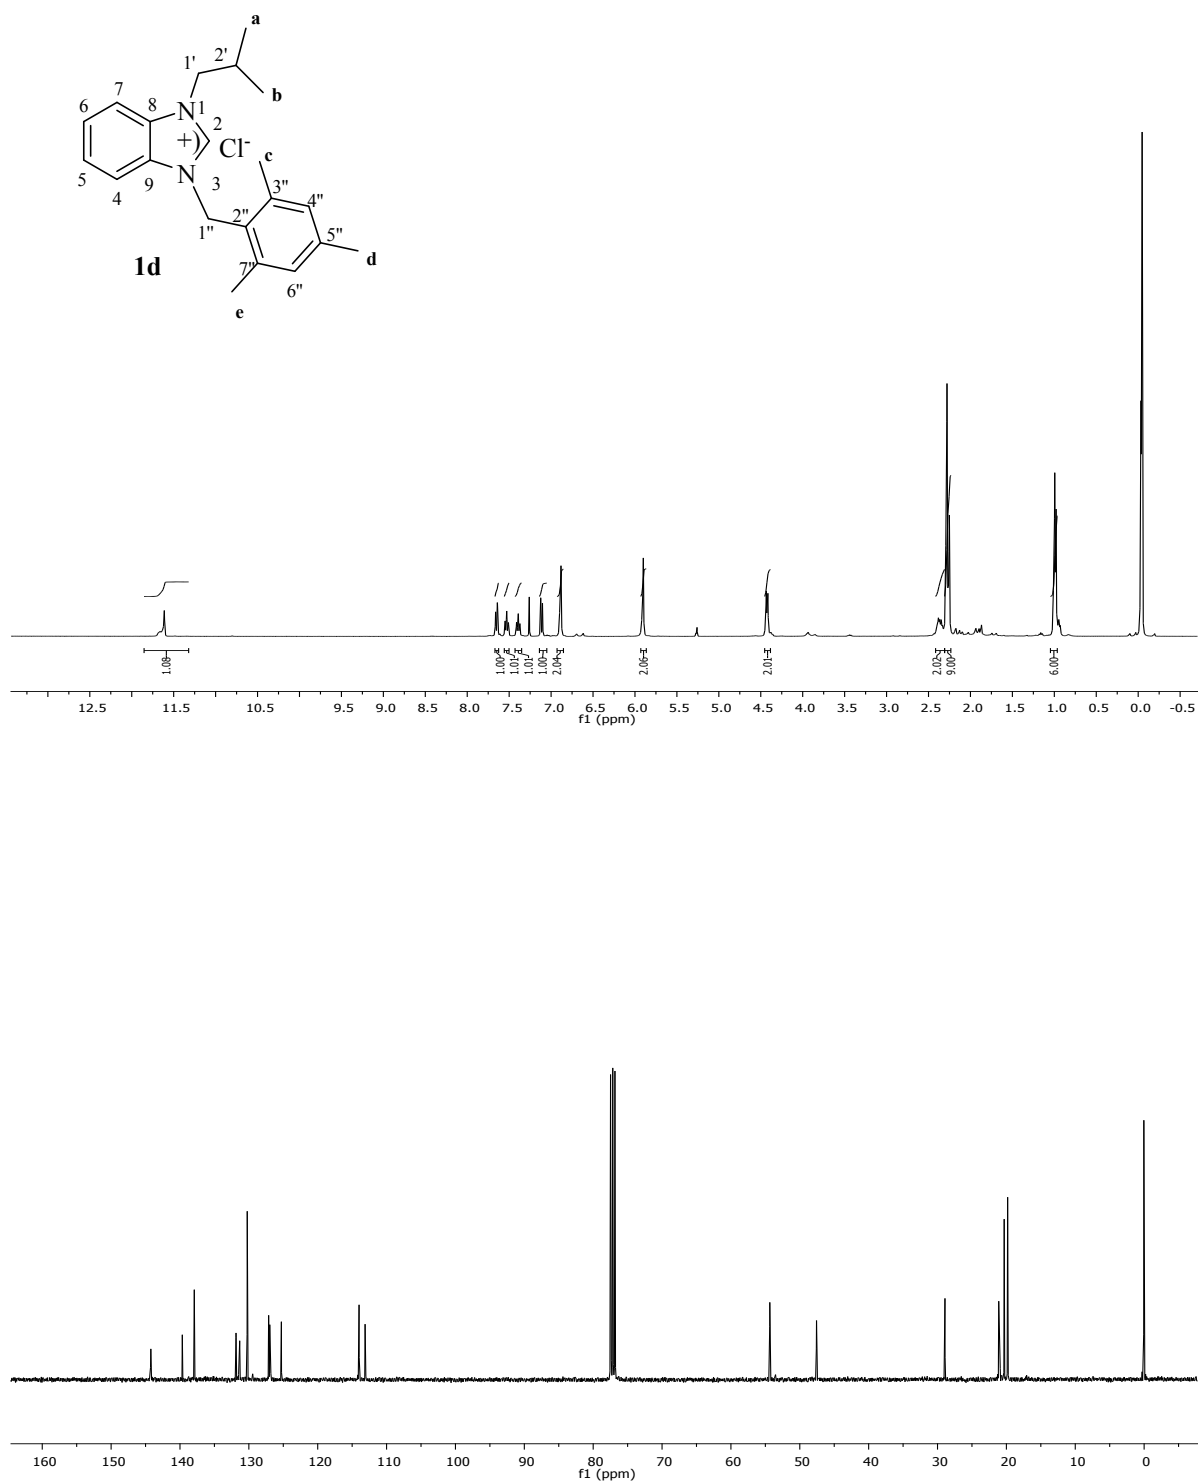

**Figure 7.**  $^1\text{H}$  and  $^{13}\text{C}\{^1\text{H}\}$  NMR spectrums of **1d**

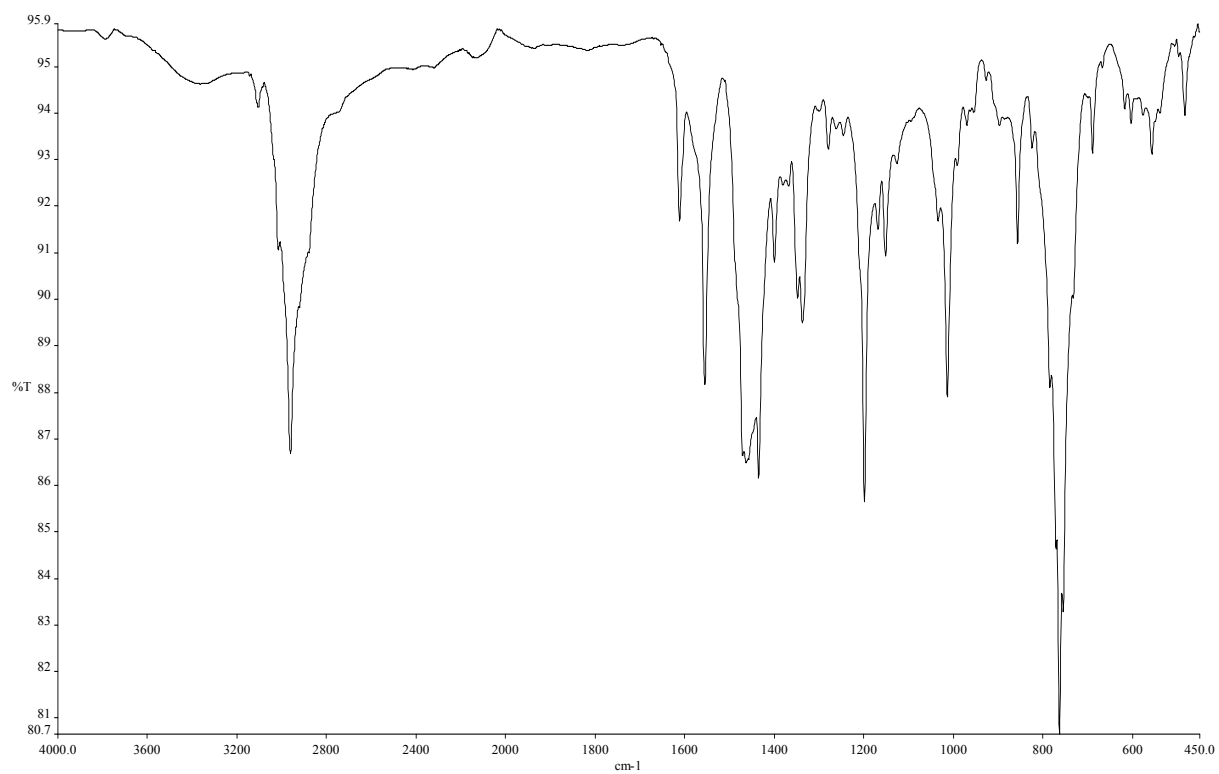

**Figure 8.** FT-IR spectrum of **1d**

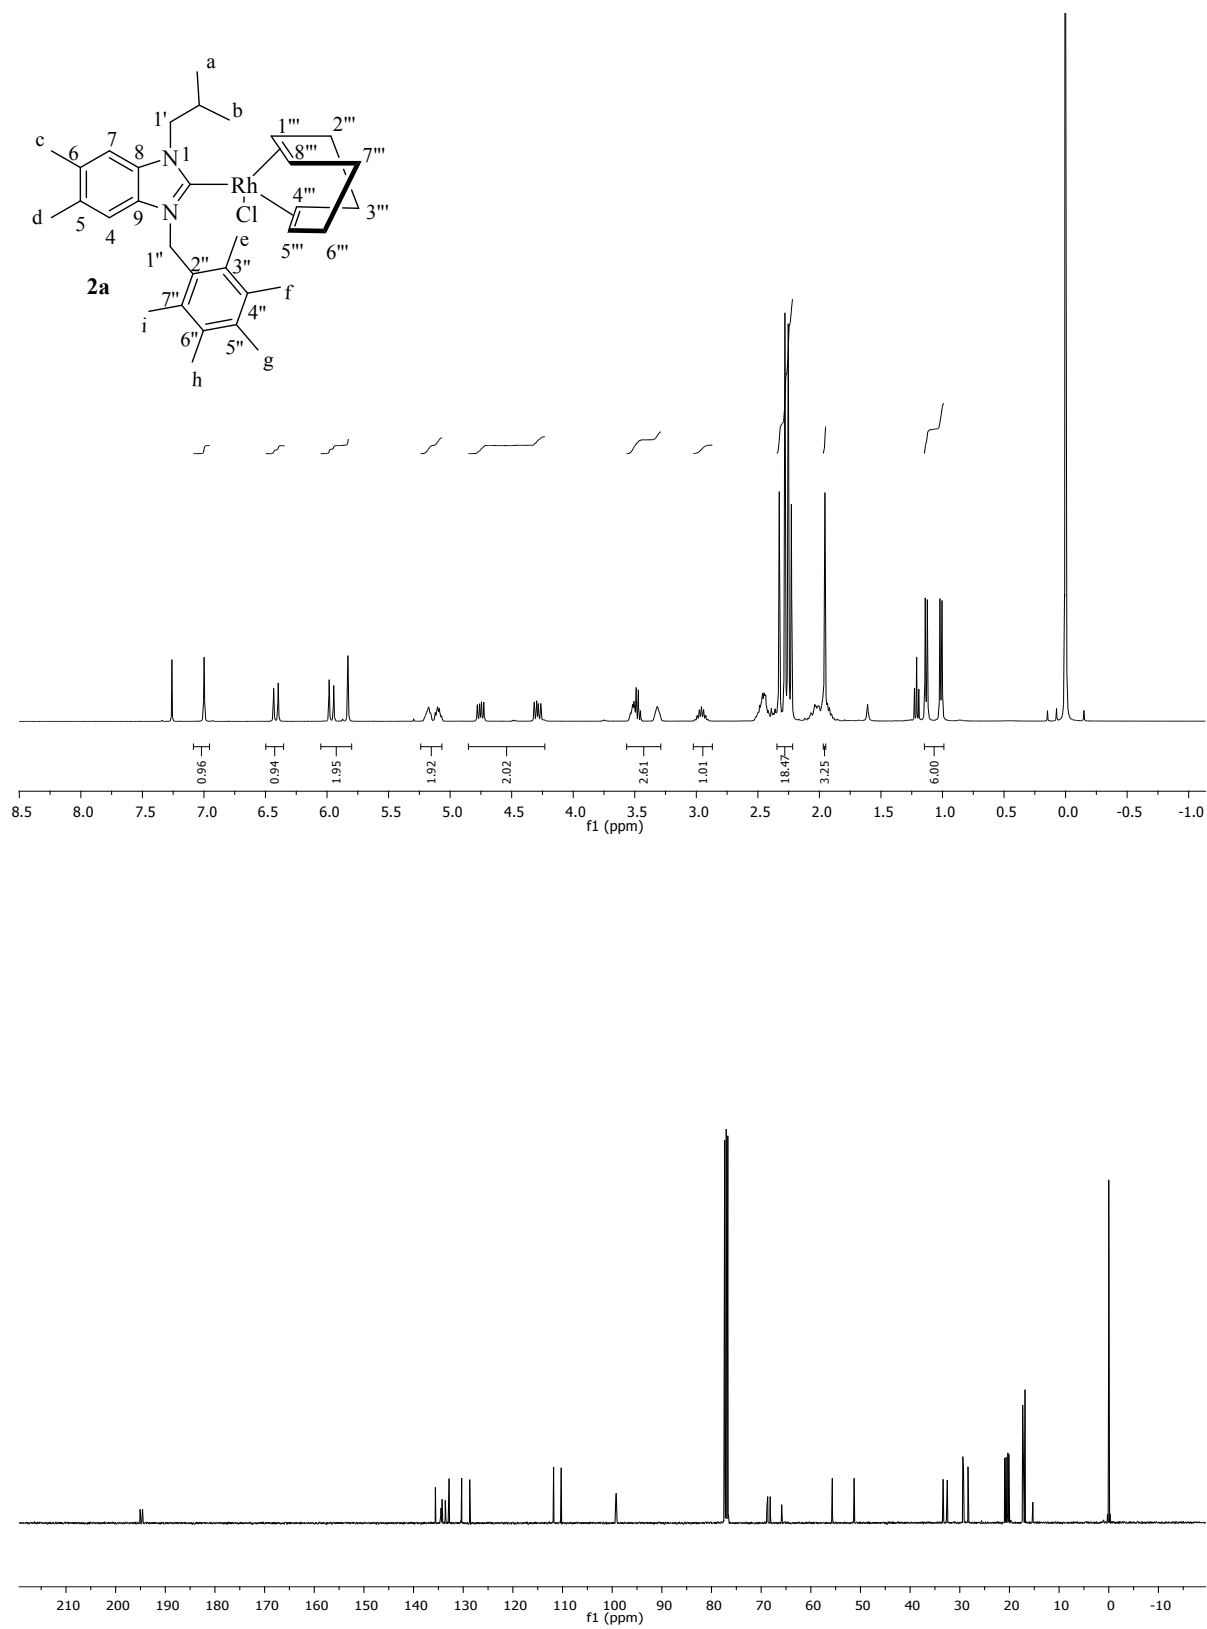

**Figure 9.**  $^1\text{H}$  and  $^{13}\text{C}\{^1\text{H}\}$  NMR spectrums of **2a**

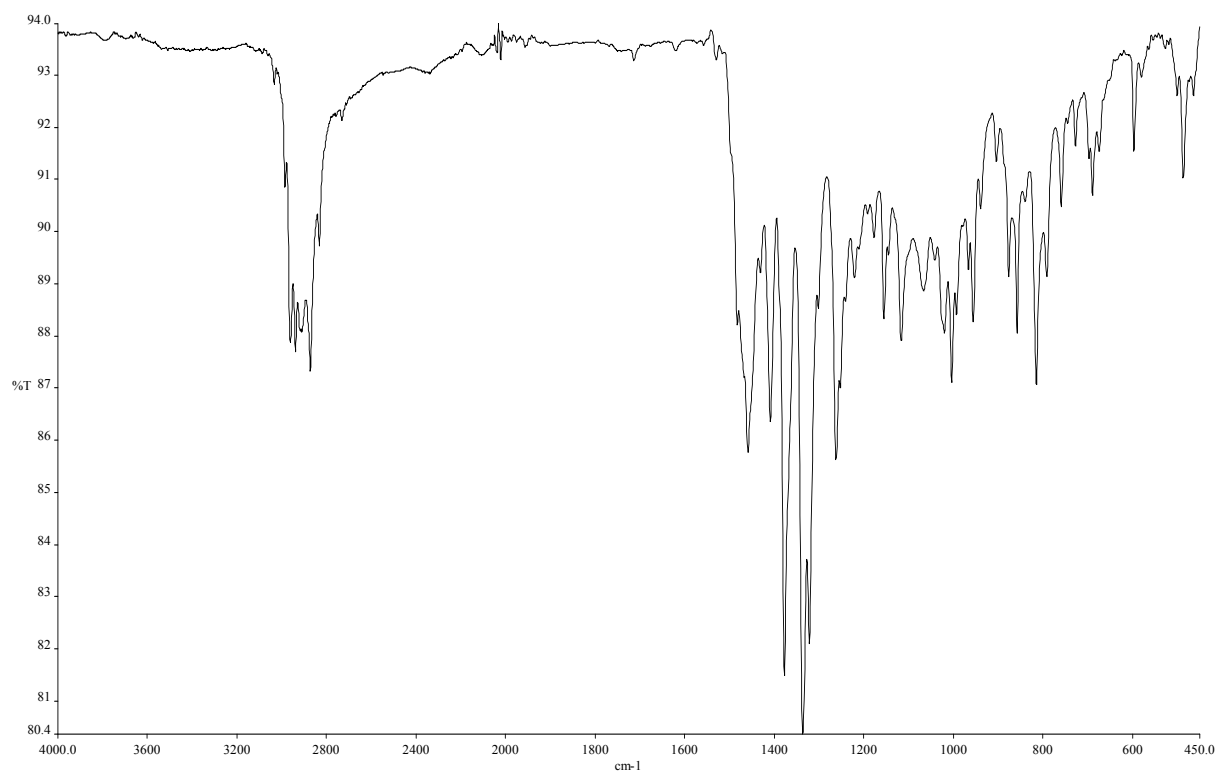

**Figure 10.** FT-IR spectrum of **2a**

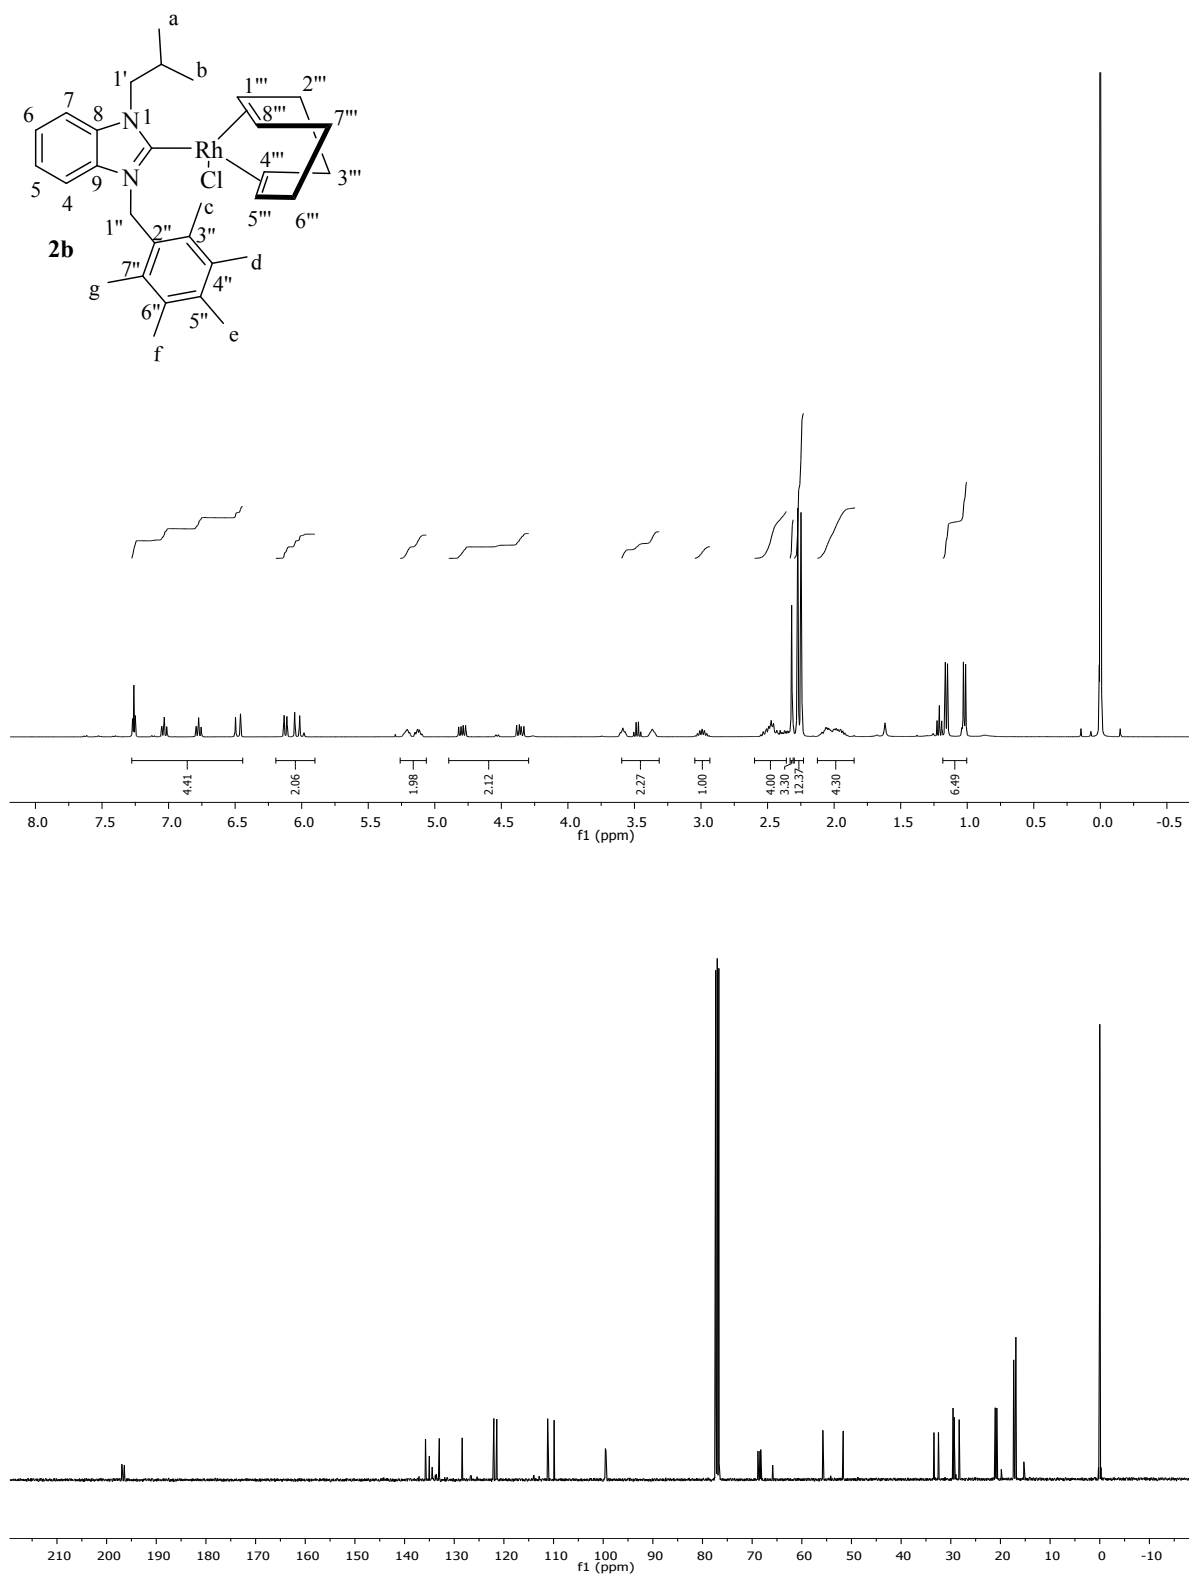

**Figure 11.**  $^1\text{H}$  and  $^{13}\text{C}\{^1\text{H}\}$  NMR spectrums of **2b**

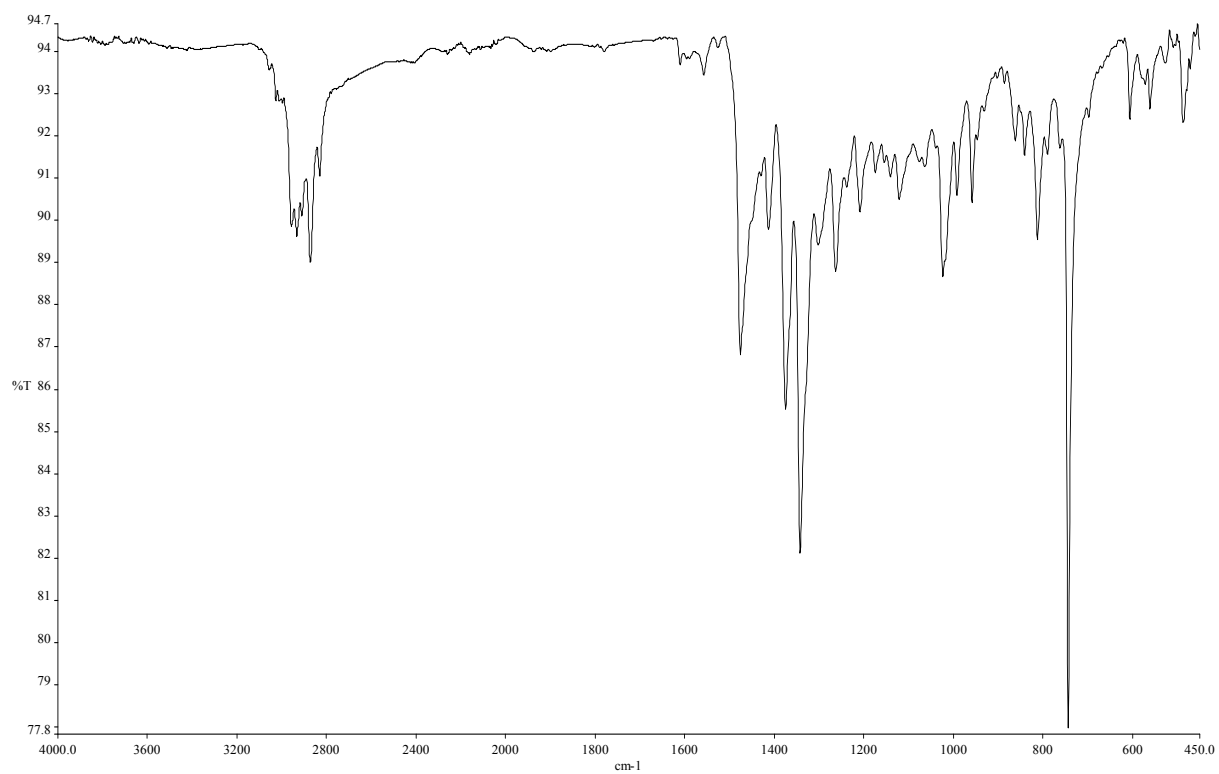

**Figure 12.** FT-IR spectrum of **2b**.

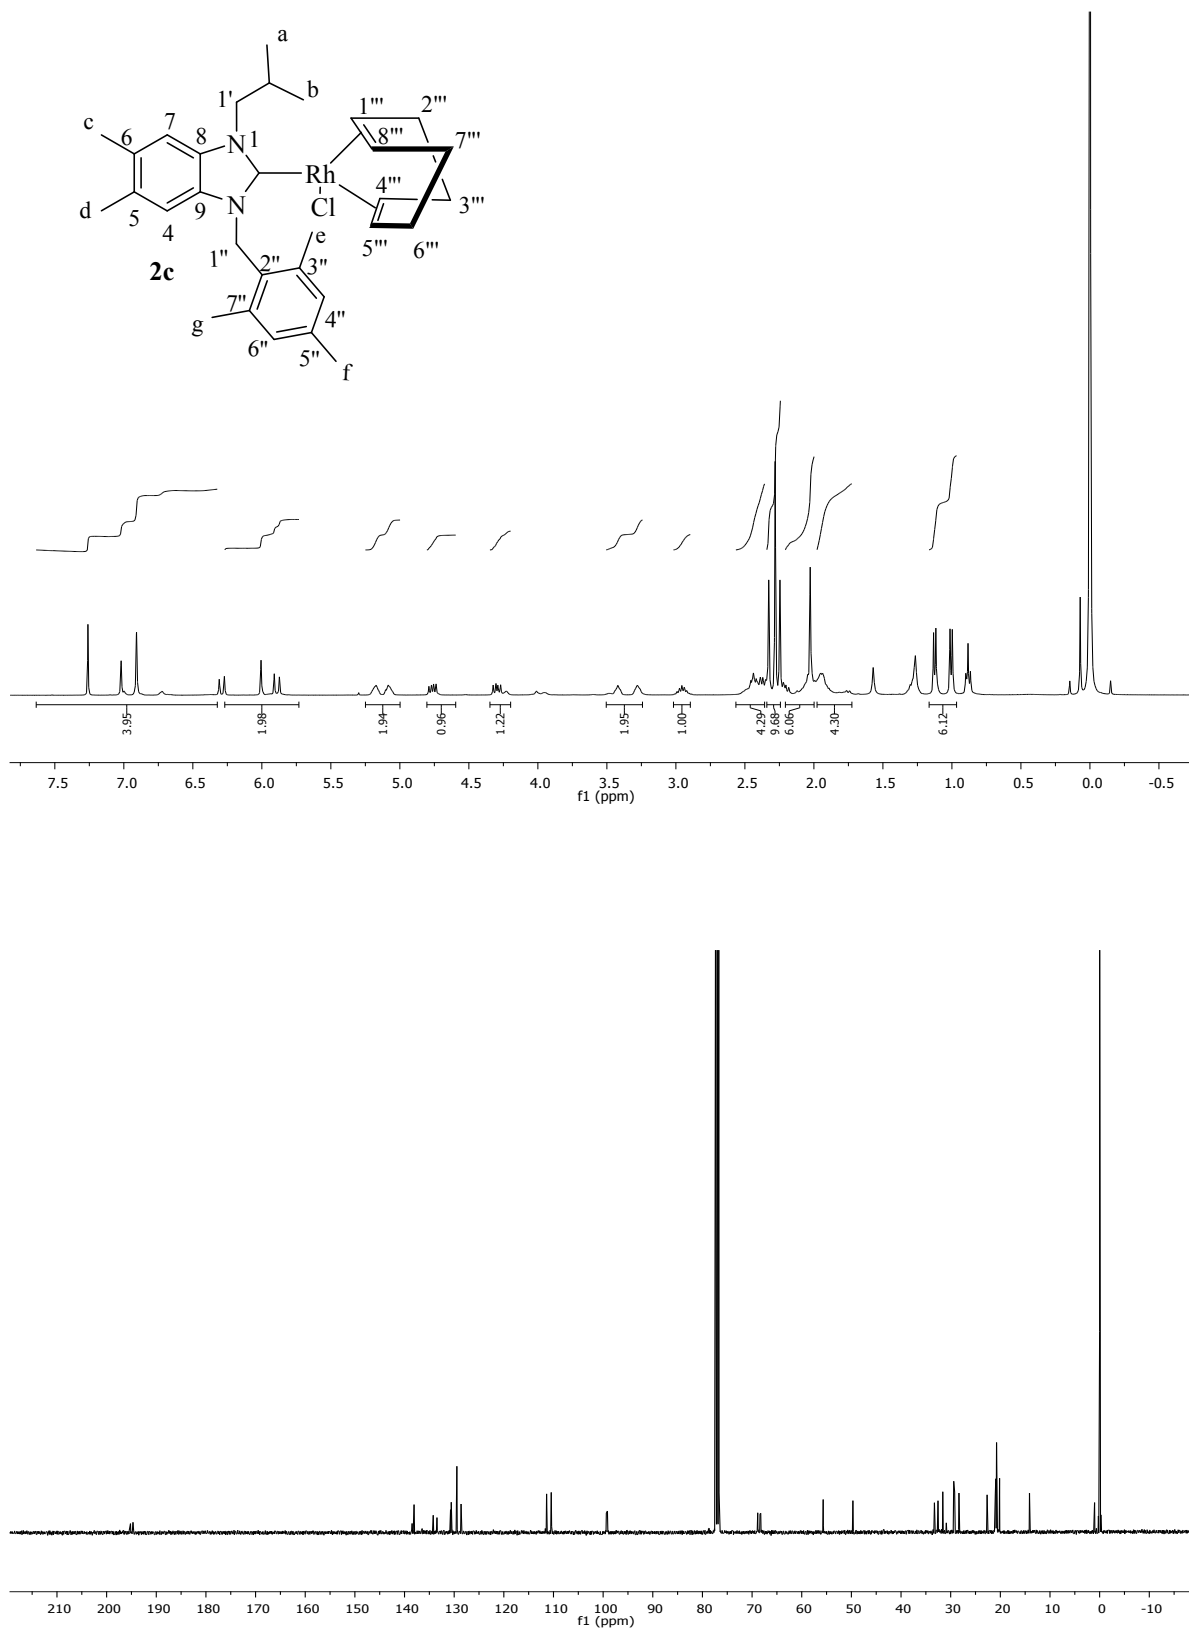

**Figure 13.**  $^1\text{H}$  and  $^{13}\text{C}\{^1\text{H}\}$  NMR spectrums of **2c**

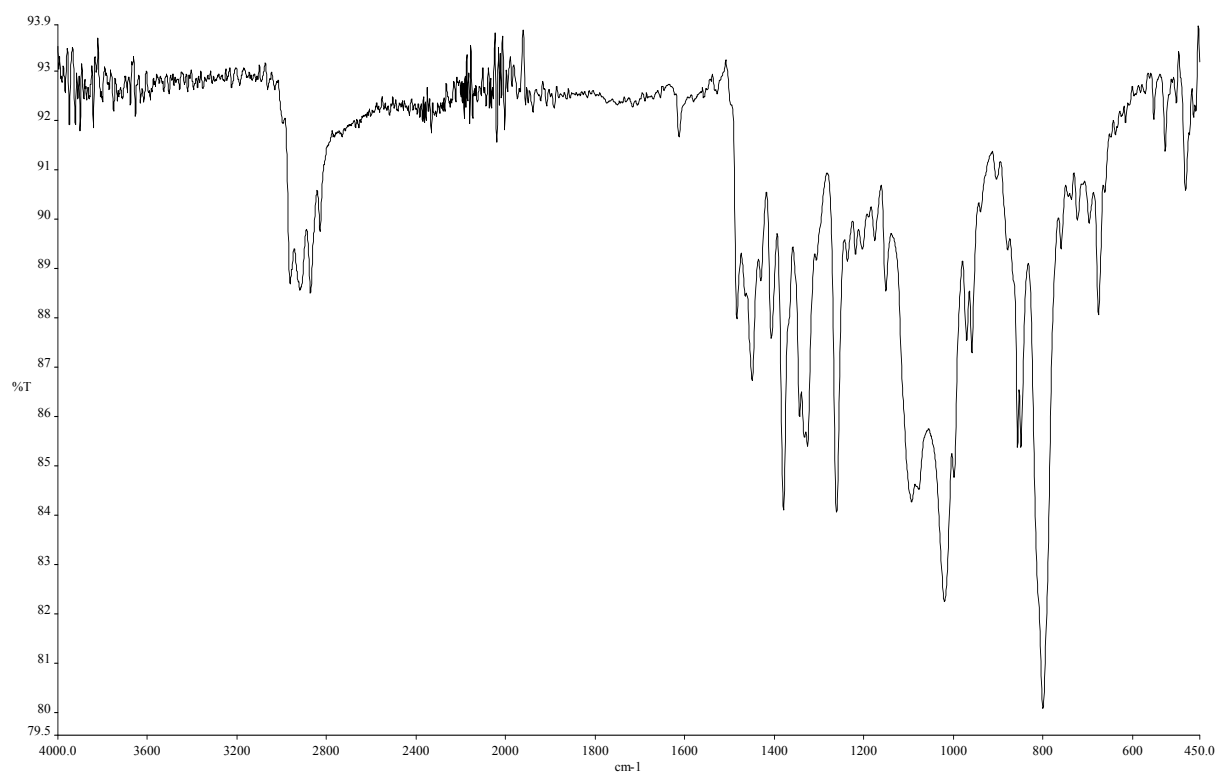

**Figure 12.** FT-IR spectrum of **2c**.



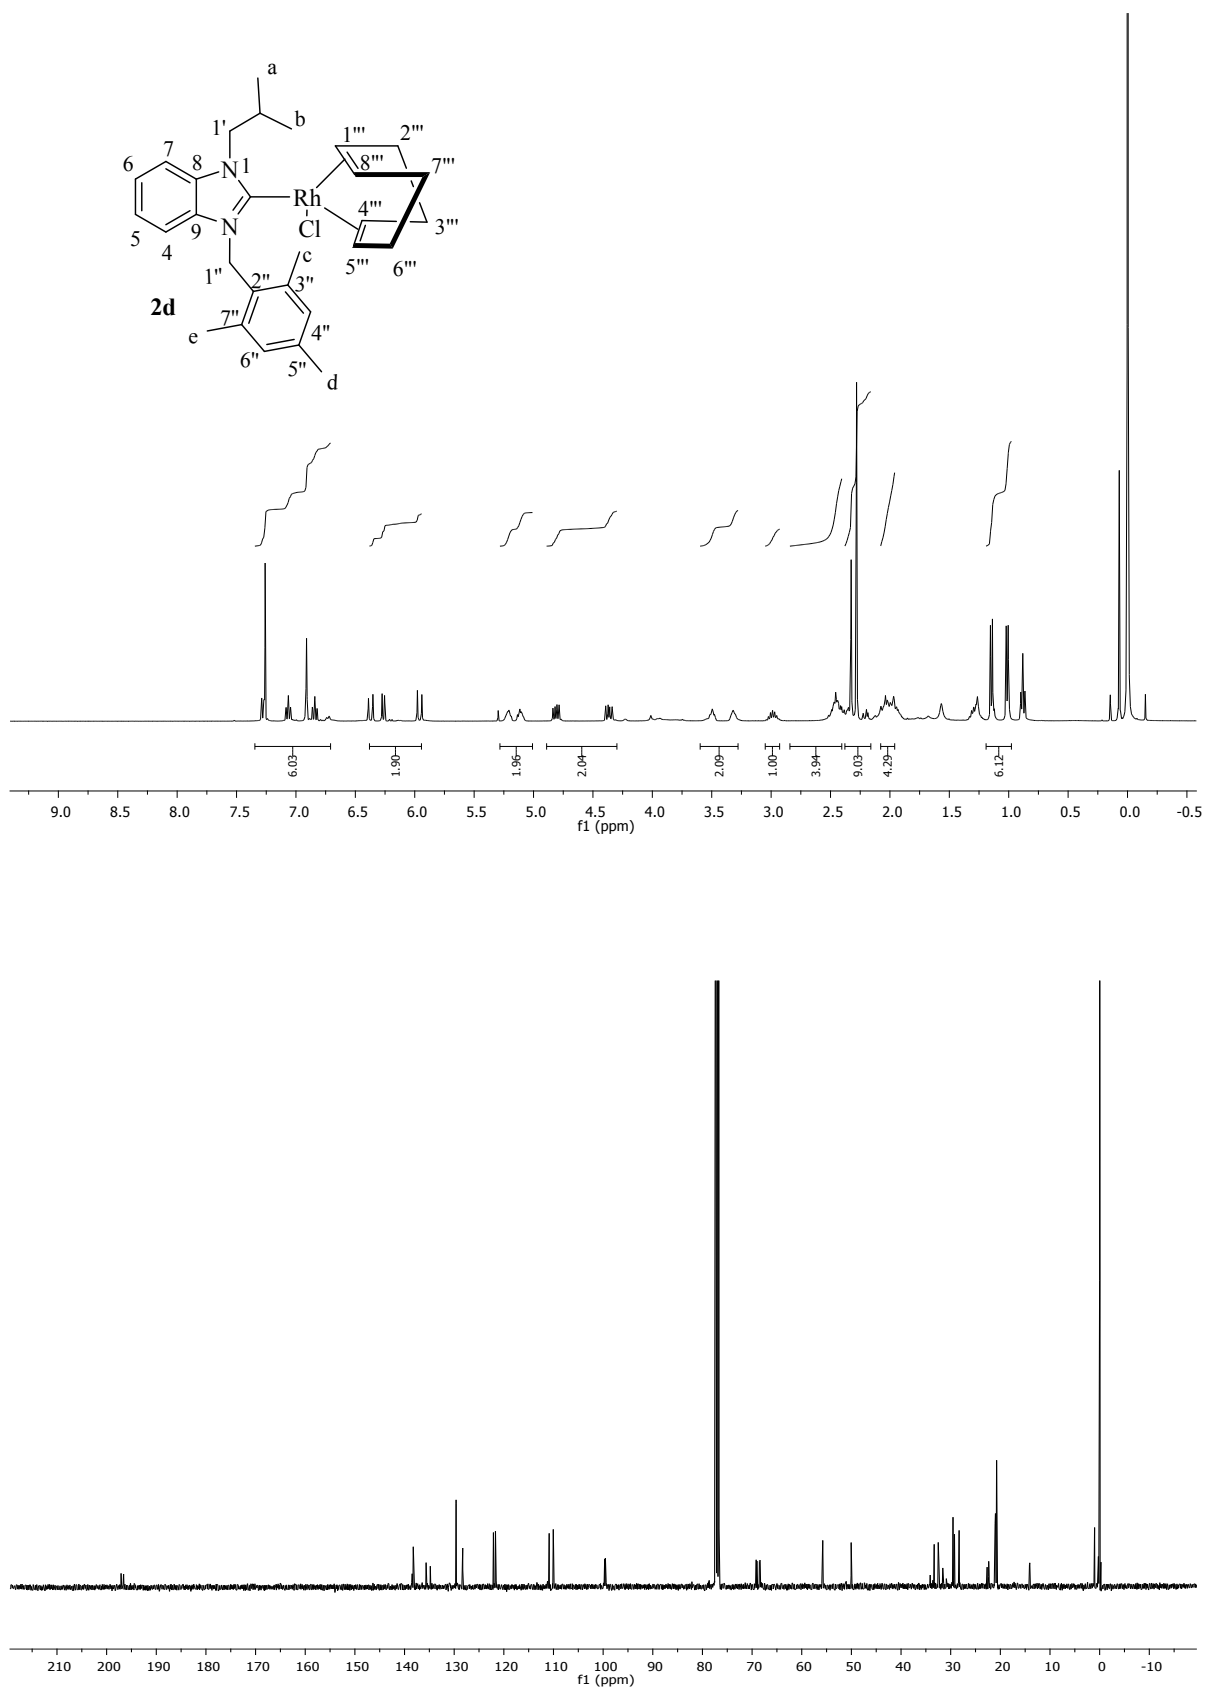

**Figure 15.**  $^1\text{H}$  and  $^{13}\text{C}\{^1\text{H}\}$  NMR spectra of **2d**

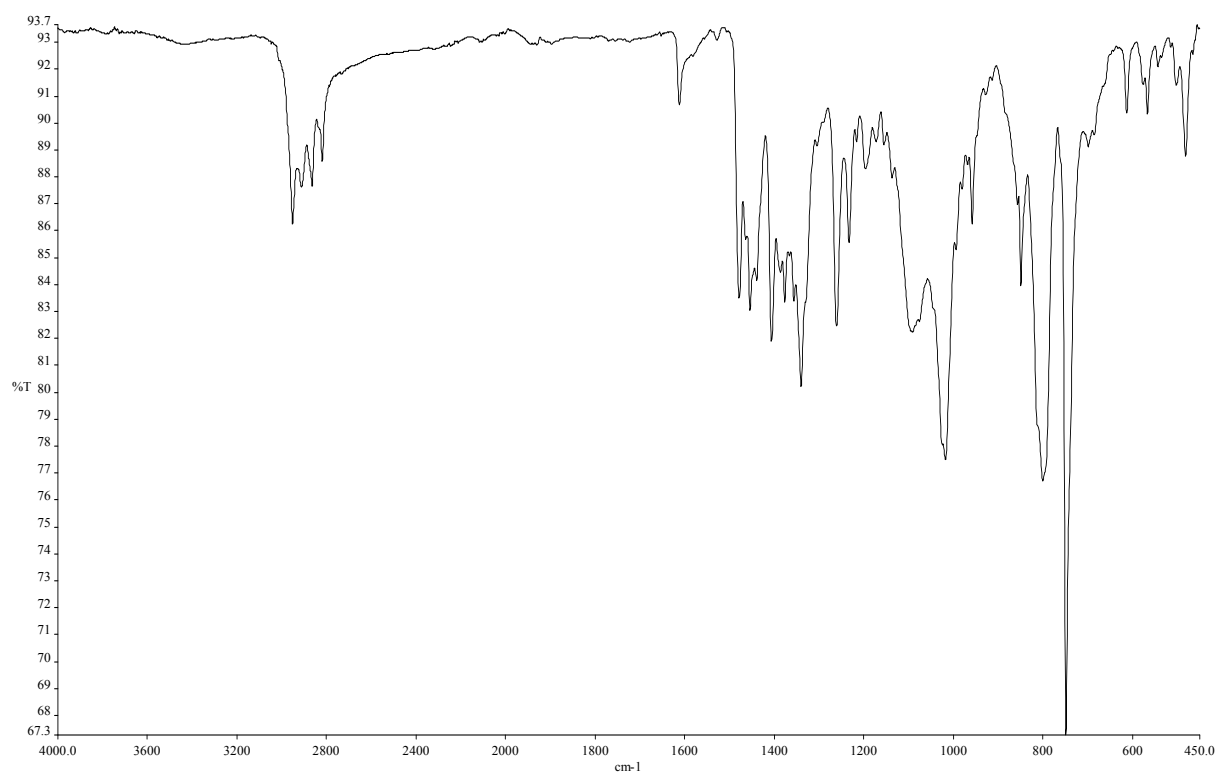

**Figure 16.** FT-IR spectrum of **2d**
